# Supplementary material
Source: publisher site journal article supplement (https://www.spandidos-publications.com/8175/downloadSupplementary)

Figure S1. The Cancer Genome Atlas endoplasmic reticulum to nucleus signaling 1 gene expression profiles of several cancers and corresponding normal tissue samples. Data from the Gene Expression Profiling Interactive Analysis website (<http://gepia.cancer-pku.cn/index.html>). TPM, transcripts per million.

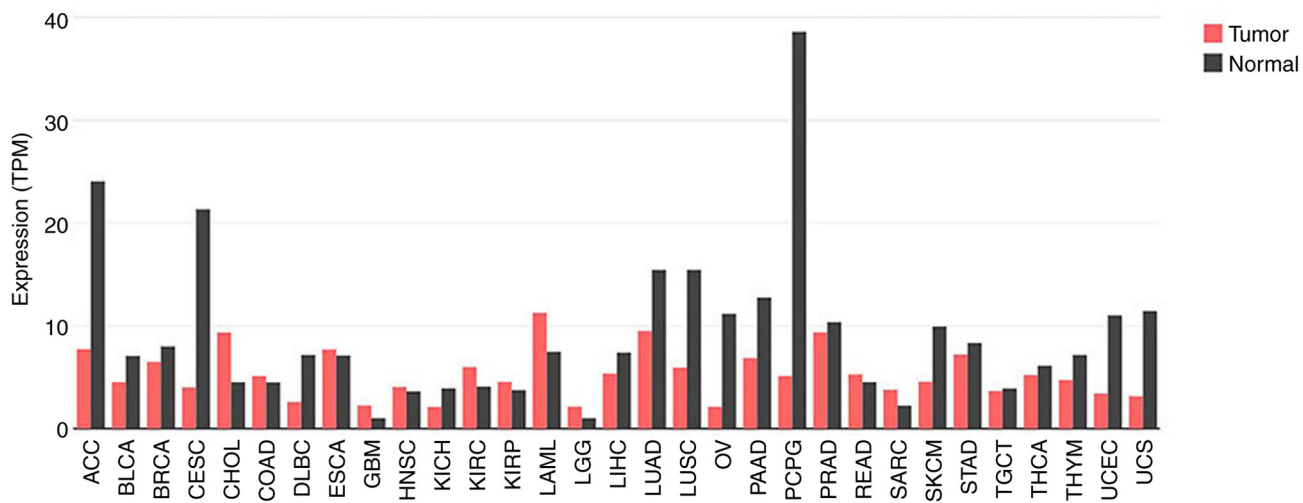

Figure S2. Dose-response of APY29-induced cytotoxicity in breast cancer cells. Cell viability of (A) MDA-MB-231, (B) MDA-MB-468, (C) 4T1 and (D) HT1080 cells. Dose-response of (E) sunitinib- and (F) KIRA6-induced cytotoxicity in MDA-MB-231 cells. Data are presented as mean  $\pm$  standard error of the mean (n=6). KIRA6, inositol-requiring enzyme 1 $\alpha$  kinase-inhibiting RNase attenuator.

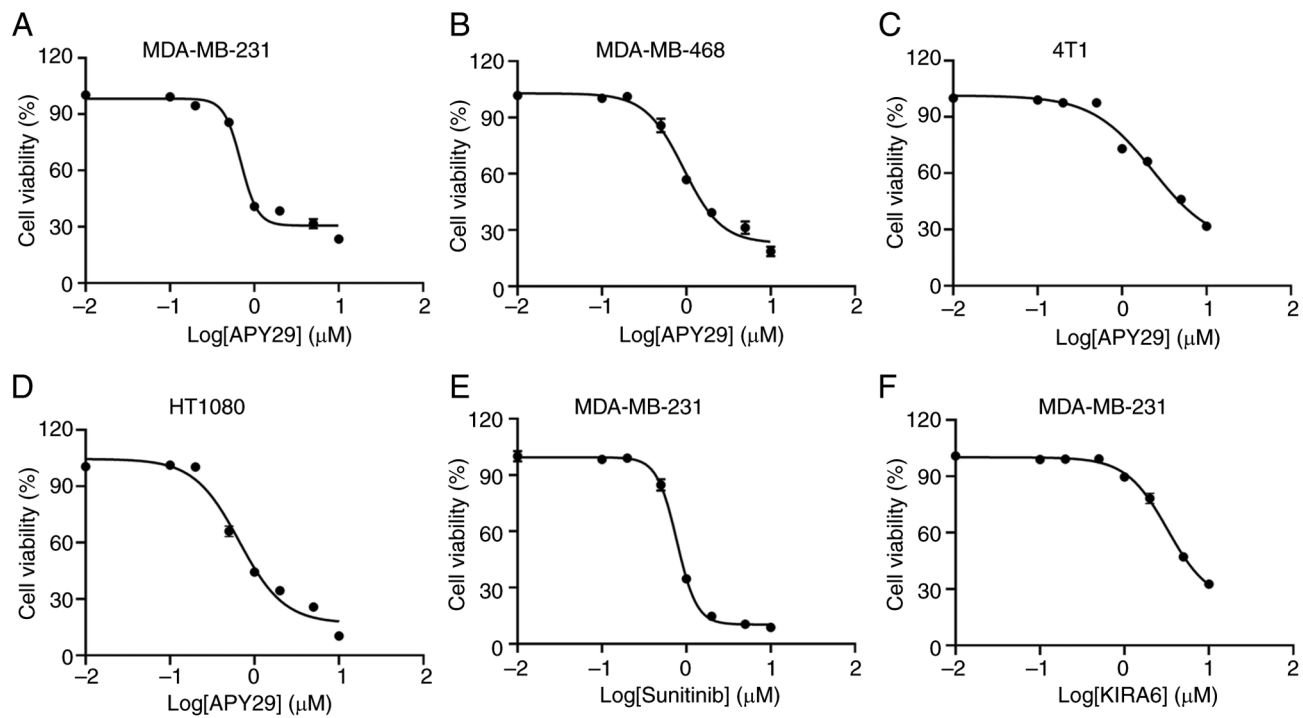

Figure S3. Cell viability in HT1080 cells treated with (A) erastin, (B) SAS, (C) glutamate or (D) cystine restriction for 24 h in the presence or absence of APY29 (0.2  $\mu$ M). Cell viability in MDA-MB-231 treated with (E) RSL3 or (F) ML162 for 24 h in the presence or absence of APY29 (0.2  $\mu$ M). Cell viability in HT1080 cells treated with (G) RSL3 or (H) ML162 for 24 h in the presence or absence of APY29 (0.2  $\mu$ M). Data are presented as mean  $\pm$  standard error of the mean (n=6). \*\*\*\*P<0.0001 vs. Control. RSL3, RAS-selective lethal 3; SAS, sulfasalazine.

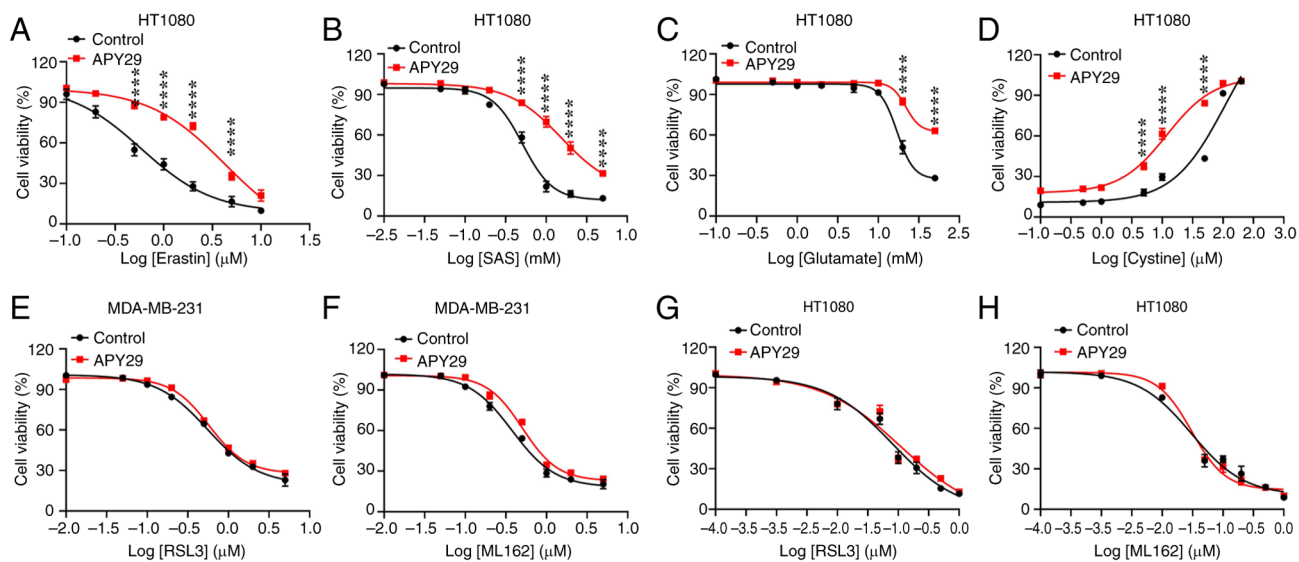

Figure S4. Western blot analysis of MDA-MB-231 cells over-expressing wild-type IRE1 $\alpha$  and kinase-dead IRE1 $\alpha$  mutant. Red boxes highlight sections of blots shown in the indicated figures. The target protein and corresponding  $\beta$ -actin were derived from the same membrane through sequential probing. IRE1 $\alpha$ , inositol-requiring enzyme 1 $\alpha$ ; NC, negative control; WT, wildtype.

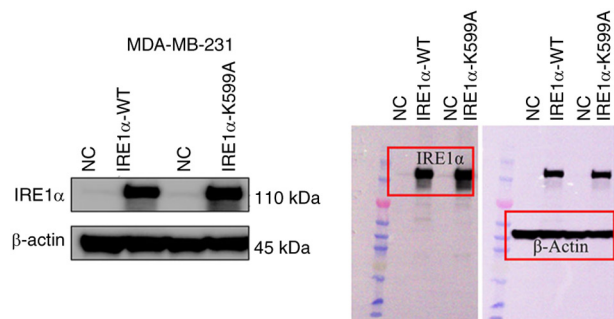

Figure S5. Reverse transcription-quantitative PCR results. mRNA levels of xCT were analyzed using reverse transcription-quantitative PCR in (A) MDA-MB-231, (B) MDA-MB-468 and (C) 4T1 cells following 24-h treatment with APY29 (0.2  $\mu$ M). Data are presented as mean  $\pm$  standard error of the mean (n=5).

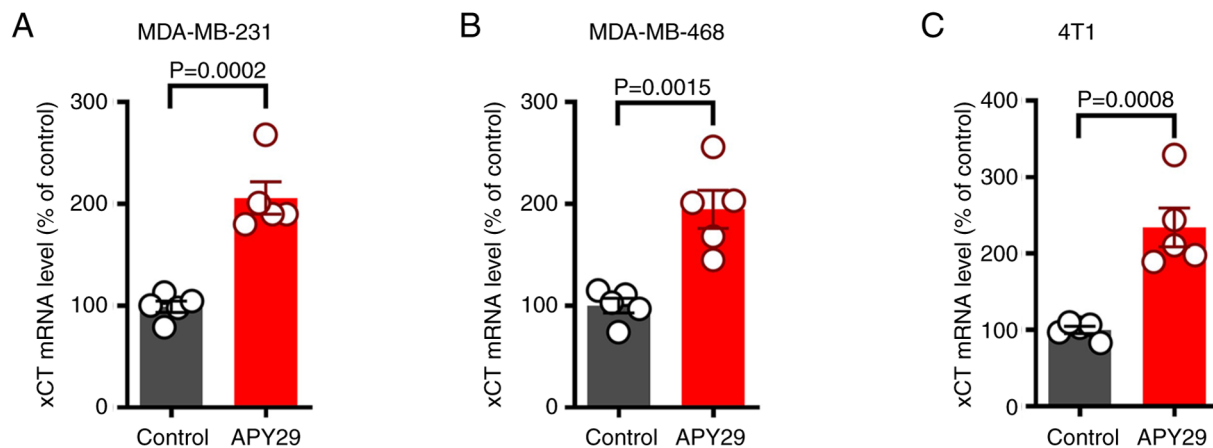

Figure S6. Western blotting results. Protein expression of xCT was analyzed using western blotting in (A) MDA-MB-468 and (B) 4T1 cells following 24-h treatment with APY29 (0.2  $\mu$ M). GSH levels were measured in MDA-MB-468 cells following 12-h treatment with (C) erastin (5  $\mu$ M) or (D) SAS (1 mM), in the presence or absence of APY29 (0.2  $\mu$ M). GSH levels were measured in 4T1 cells following 12-h treatment with (E) erastin (5  $\mu$ M) or (F) SAS (1 mM), in the presence or absence of APY29 (0.2  $\mu$ M). Data are presented as mean  $\pm$  standard error of the mean (n=3). xCT, solute carrier family 7 member 11; GSH, glutathione; SAS, sulfasalazine.

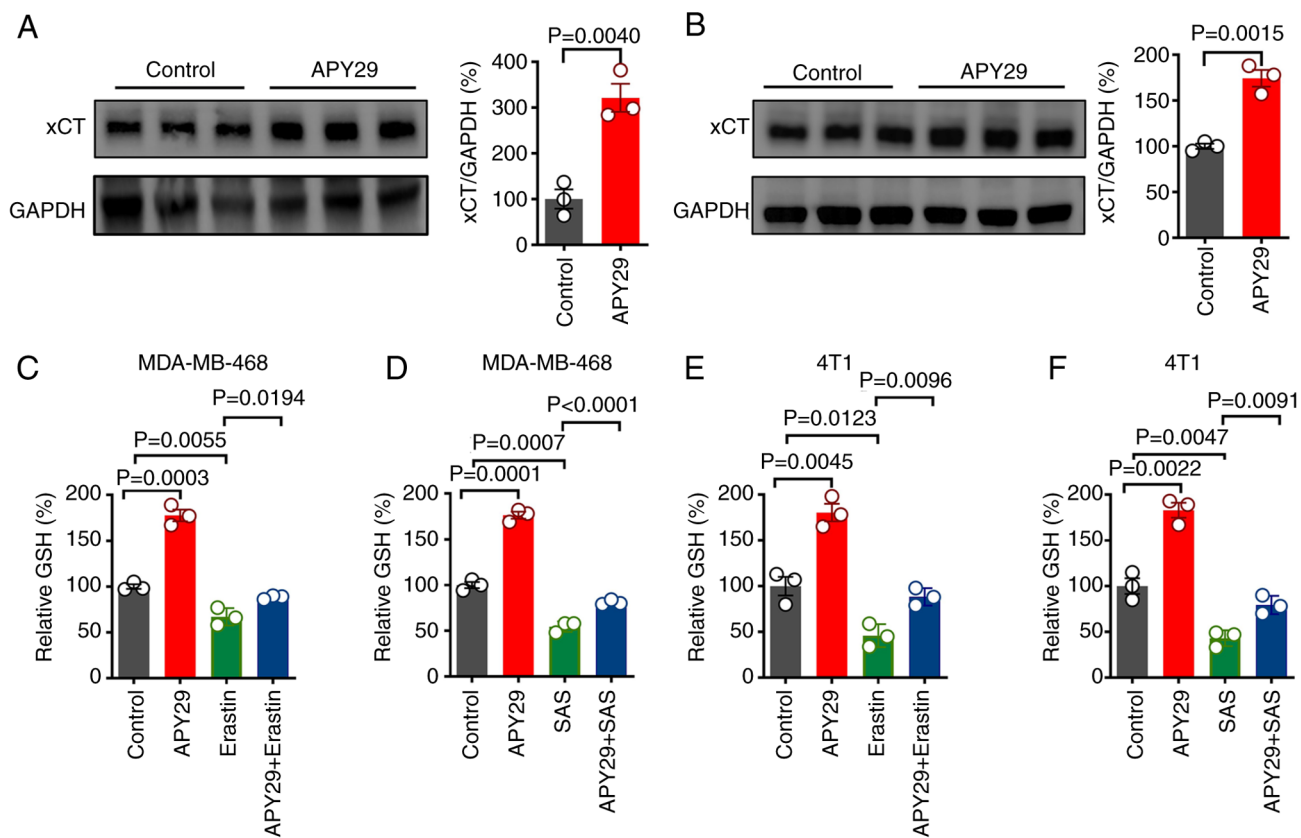

Figure S7. Scans of uncropped blots. Red boxes highlight sections of blots shown in the indicated figures. The target protein and corresponding loading control ( $\beta$ -actin or GAPDH) for each set were derived from the same membrane through sequential probing. xCT, solute carrier family 7 member 11; ACSL4, acyl-CoA synthetase long chain family member 4; GPX4, glutathione peroxidase 4.

Fig. 7A

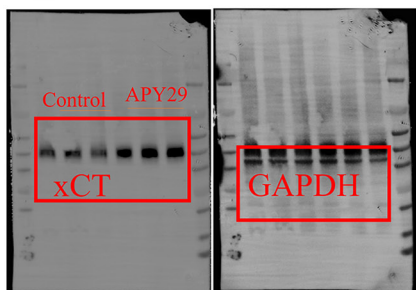

Fig. 7B

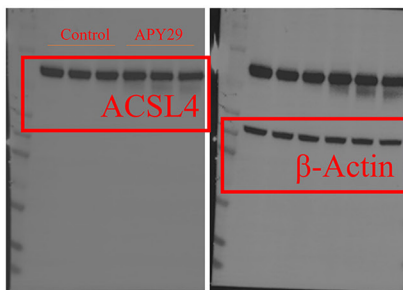

Fig. 7C

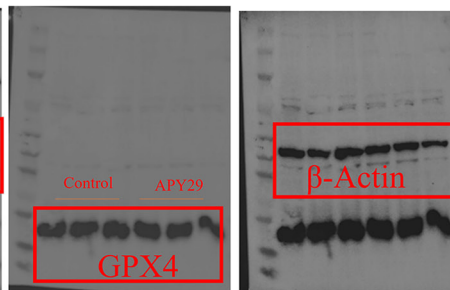

Fig. S6A

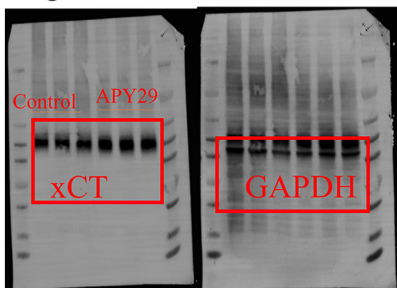

Fig. S6B

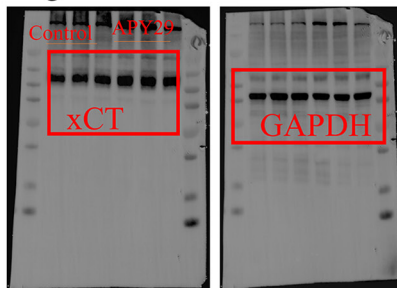

Supplement: Supplementary file 1 [file downloadSupplementary]
